# Supplementary material
Source: MDPI journal article supplement (https://www.mdpi.com/2304-6740/7/2/22)
Supplement: s1 [file s1]

# Supplementary Materials: Molecularly Engineered Lithium–Chromium Alkoxide for Selective Synthesis of $\text{LiCrO}_2$ and $\text{Li}_2\text{CrO}_4$ Nanomaterials

Olusola Ojelere, David Graf and Sanjay Mathur \*

**Keywords:** Heterometallic, heteroarylalkenolate, precursors, solvothermal, nanoparticles.

Supporting Tables:

**Table S1** Details on crystal and structure refinement of compound **1**

**Table S2** Selected bond distances ( $\text{\AA}$ ) of compounds **1**

**Table S3** Selected bond angles ( $^\circ$ ) of compounds **1**

**Table S4** Details on crystal and structure refinement of compound **2**

**Table S5** Selected bond distances ( $\text{\AA}$ ) of compounds **2**

**Table S6** Selected bond angles ( $^\circ$ ) of compounds **2**

**Figure S1** UV-Vis spectra of compound **1** and **2** recorded in THF.

**Table S1.** Crystallographic data for compounds **1**

|                                      |                                                                            |
|--------------------------------------|----------------------------------------------------------------------------|
| Identification code                  | [Li <sub>2</sub> Cr(O <sup>t</sup> Bu) <sub>4</sub> Cl(THF) <sub>2</sub> ] |
| Empirical formula                    | C <sub>24</sub> H <sub>52</sub> ClCrLi <sub>2</sub> O <sub>6</sub>         |
| Formula weight                       | 537.98                                                                     |
| Temperature/K                        | 293(2)                                                                     |
| Crystal system                       | monoclinic                                                                 |
| Space group                          | C2/c                                                                       |
| a/Å                                  | 25.681(3)                                                                  |
| b/Å                                  | 8.9889(9)                                                                  |
| c/Å                                  | 18.4468(18)                                                                |
| α/°                                  | 90                                                                         |
| β/°                                  | 133.511(6)                                                                 |
| γ/°                                  | 90                                                                         |
| Volume/Å <sup>3</sup>                | 3088.3(6)                                                                  |
| Z                                    | 4                                                                          |
| ρ <sub>calc</sub> /g/cm <sup>3</sup> | 1.157                                                                      |
| μ/mm <sup>-1</sup>                   | 0.488                                                                      |
| F(000)                               | 1164.0                                                                     |
| Crystal size/mm <sup>3</sup>         | 0.200 × 0.100 × 0.100                                                      |
| Radiation                            | MoKα (λ = 0.71073)                                                         |
| 2θ range for data collection/°       | 5.032 to 53.56                                                             |
| Index ranges                         | -32 ≤ h ≤ 32, -10 ≤ k ≤ 11, -23 ≤ l ≤ 23                                   |
| Reflections collected                | 6874                                                                       |

**Table S2:** Some selected bond lengths for compounds **1**

| Atom | Atom | Length/Å |   |
|------|------|----------|---|
| Cr1  | O4   | 1.864(3) | - |
| Cr1  | O5   | 1.868(3) |   |
| Li2  | O4   | 1.922(8) |   |
| Li2  | O5   | 1.949(8) |   |
| Li2  | O2   | 1.964(8) |   |
| Li2  | Cl3  | 2.290(7) |   |

**Table S3:** Some selected bond Angles for compound **1**.

| Atom            | Atom | Atom             | Angle/°    |
|-----------------|------|------------------|------------|
| O4              | Cr1  | O4               | 122.51(18) |
| O4              | Cr1  | O5               | 82.97(12)  |
| O4 <sup>1</sup> | Cr1  | O5               | 124.58(12) |
| O4              | Cr1  | O5 <sup>1</sup>  | 124.58(12) |
| O4 <sup>1</sup> | Cr1  | O5 <sup>1</sup>  | 82.97(12)  |
| O5              | Cr1  | O5 <sup>1</sup>  | 124.85(18) |
| O4              | Cr1  | Li2 <sup>1</sup> | 141.44(18) |
| O4 <sup>1</sup> | Cr1  | Li2 <sup>1</sup> | 41.21(18)  |
| O5              | Cr1  | Li2 <sup>1</sup> | 135.55(17) |
| O5 <sup>1</sup> | Cr1  | Li2 <sup>1</sup> | 42.07(17)  |
| O4              | Cr1  | Li2              | 41.21(18)  |
| O4 <sup>1</sup> | Cr1  | Li2              | 141.44(18) |
| O5              | Cr1  | Li2              | 42.07(17)  |
| O5              | Cr1  | Li2              | 135.55(17) |
| Li2             | Cr1  | Li2              | 176.5(3)   |
| O4              | Li2  | O5               | 79.4(3)    |
| O4              | Li2  | O2               | 116.6(4)   |
| O5              | Li2  | O2               | 110.7(3)   |
| O4              | Li2  | Cl3              | 116.6(3)   |
| O5              | Li2  | Cl3              | 130.6(4)   |
| O2              | Li2  | Cl3              | 102.8(3)   |
| O4              | Li2  | Cr1              | 39.70(15)  |
| O5              | Li2  | Cr1              | 39.95(16)  |
| O2              | Li2  | Cr1              | 125.0(3)   |
| Cl3             | Li2  | Cr1              | 131.9(3)   |
| Li2             | Cl3  | Li2              | 180.0(4)   |

---

**Table S4:** Crystal data and structure refinement for compound **2**.

|                                    |                                                                                  |
|------------------------------------|----------------------------------------------------------------------------------|
| Formula                            | C <sub>32</sub> H <sub>44</sub> CrF <sub>6</sub> LiN <sub>2</sub> O <sub>6</sub> |
| Formula weight                     | 725.63                                                                           |
| Temperature/K                      | 293(2)                                                                           |
| Crystal system                     | monoclinic                                                                       |
| Space group                        | P2 <sub>1</sub> /c                                                               |
| a/Å                                | 14.8499(6)                                                                       |
| b/Å                                | 10.7574(5)                                                                       |
| c/Å                                | 22.6334(11)                                                                      |
| α/°                                | 90                                                                               |
| β/°                                | 90.059(4)                                                                        |
| γ/°                                | 90                                                                               |
| Volume/Å <sup>3</sup>              | 3615.6(3)                                                                        |
| Z                                  | 4                                                                                |
| ρ <sub>calc</sub> /cm <sup>3</sup> | 1.333                                                                            |
| μ/mm <sup>-1</sup>                 | 0.390                                                                            |
| F(000)                             | 1516.0                                                                           |
| Crystal size/mm <sup>3</sup>       | 0.3 × 0.2 × 0.2                                                                  |
| Radiation                          | MoKα (λ = 0.71073)                                                               |
| Reflections collected              | 32116                                                                            |
| Independent reflections            | 7685 [R <sub>int</sub> = 0.0931, R <sub>sigma</sub> = 0.0772]                    |
| Goodness-of-fit on F <sup>2</sup>  | 1.040                                                                            |
| Final R indexes [I ≥ 2σ (I)]       | R <sub>1</sub> = 0.0679, wR <sub>2</sub> = 0.1627                                |
| Final R indexes [all data]         | R <sub>1</sub> = 0.1149, wR <sub>2</sub> = 0.1826                                |

**Table S5:** Some selected bond lengths for compound **2**.

| Atom | Atom | Length/Å  |
|------|------|-----------|
| Cr1  | O1   | 1.949(3)  |
| Cr1  | O2   | 1.950(3)  |
| Cr1  | O4   | 1.954(3)  |
| Cr1  | O3   | 1.971(4)  |
| Cr1  | N2   | 2.087(5)  |
| Cr1  | N1   | 2.112(5)  |
| Cr1  | Li1  | 2.900(7)  |
| Li1  | O2   | 1.897(9)  |
| Li1  | O4   | 1.912(9)  |
| Li1  | O5   | 2.006(12) |
| Li1  | O6   | 2.095(13) |

**Table S6:** Some selected bond angles for compound **2**.

| Atom Atom |     |     | Angle/°    |
|-----------|-----|-----|------------|
| O1        | Cr1 | O2  | 96.12(15)  |
| O1        | Cr1 | O4  | 176.18(18) |
| O2        | Cr1 | O4  | 81.10(13)  |
| O1        | Cr1 | O3  | 86.78(15)  |
| O2        | Cr1 | O3  | 176.85(16) |
| O4        | Cr1 | O3  | 96.06(15)  |
| O1        | Cr1 | N2  | 84.3(2)    |
| O2        | Cr1 | N2  | 93.0(2)    |
| O4        | Cr1 | N2  | 93.2(2)    |
| O3        | Cr1 | N2  | 88.47(18)  |
| O1        | Cr1 | N1  | 88.6(2)    |
| O2        | Cr1 | N1  | 93.7(2)    |
| O4        | Cr1 | N1  | 94.2(2)    |
| O3        | Cr1 | N1  | 85.16(18)  |
| N2        | Cr1 | N1  | 170.73(19) |
| O1        | Cr1 | Li1 | 136.5(2)   |
| O2        | Cr1 | Li1 | 40.4(2)    |
| O4        | Cr1 | Li1 | 40.9(2)    |
| O3        | Cr1 | Li1 | 136.7(2)   |
| N2        | Cr1 | Li1 | 96.9(3)    |
| N1        | Cr1 | Li1 | 92.4(3)    |
| O2        | Li1 | O4  | 83.6(3)    |
| O2        | Li1 | O5  | 118.7(7)   |
| O4        | Li1 | O5  | 121.6(6)   |
| O2        | Li1 | O6  | 120.6(6)   |
| O4        | Li1 | O6  | 115.2(6)   |
| O5        | Li1 | O6  | 98.9(4)    |
| O2        | Li1 | Cr1 | 41.78(18)  |
| O4        | Li1 | Cr1 | 41.96(18)  |
| O5        | Li1 | Cr1 | 135.2(6)   |
| O6        | Li1 | Cr1 | 125.9(5)   |
| C24       | O1  | Cr1 | 125.8(4)   |
| C9        | O2  | Li1 | 130.9(4)   |
| C9        | O2  | Cr1 | 130.5(3)   |
| Li1       | O2  | Cr1 | 97.8(3)    |
| C18       | O3  | Cr1 | 124.3(4)   |
| C1        | O4  | Li1 | 131.5(4)   |
| C1        | O4  | Cr1 | 131.0(3)   |
| Li1       | O4  | Cr1 | 97.2(3)    |
| C29       | O5  | Li1 | 122.3(5)   |
| C30       | O5  | Li1 | 130.7(6)   |

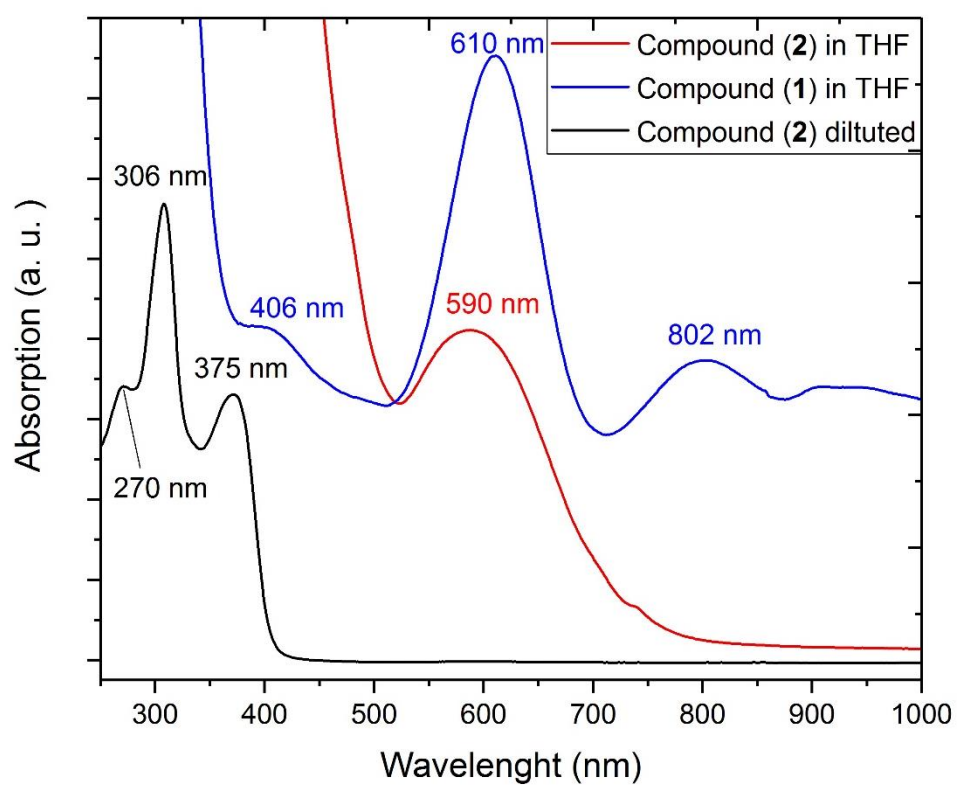

**FigureS1:** UV-Vis spectra of compound **1** and **2**.
